# Supplementary material for: Integrative multi-omics analysis reveals the contribution of neoVTX genes to venom diversity of Synanceia verrucosa
Source: Research Square preprint supplement (doi:10.21203/rs.3.rs-5243476/v1), 2024-11-02
Supplement: Supplementary file 1 [file e957df5aa39cf8c8862bcf64.xlsx]

## Sheet: toxin gene in VG
GeneID	gene name	gene_toxport	identity	GeneFamily																											Remark
Sver.2G.00987	sv_crivp1	Q91055	0.276	CRISP family
Sver.14G.00130	neovtx-α2	A0ZSK3	0.996	SNTX/VTX toxin family
Sver.14G.00131	neovtx-β3	A0ZSK4	1	SNTX/VTX toxin family
Sver.14G.00127	neovtx-β1	A0ZSK4	0.89	SNTX/VTX toxin family
Sver.14G.00129	neovtx-α1	Q98989	0.875	SNTX/VTX toxin family
Sver.4G.00839	sv_hyal1	A3QVP0	0.996	glycosyl hydrolase 56 family
Sver.11G.00774	sv_tpt1	U3EQ60	0.52	TCTP family
Sver.14G.00132	neovtx-β2	A0ZSK3	0.862	SNTX/VTX toxin family
Sver.14G.00128	neovtx-α3	A0ZSK4	0.854	SNTX/VTX toxin family
Sver.16G.00164	sv_caglp1	Q8AY75	0.386	calmodulin family
Sver.9G.00747	sv_caglp2	Q8AY75	0.386	calmodulin family
Sver.20G.00317	sv_kti1	Q6T269	0.41	venom Kunitz-type family
Sver.12G.00180		Q8AY75	0.386	calmodulin family
Sver.5G.00846		P85843	0.583	glycosyl hydrolase 13 family
Sver.24G.00110		P0DQV8	0.425	true venom lectin family
Sver.13G.00006		B2BS84	0.406	venom Kunitz-type family
Sver.11G.00087		J3RZ81	0.353	Lipase family
Sver.10G.00725		P0CV91	0.8	peroxiredoxin family
Sver.11G.00300		Q8WPI2	0.447	unassigned family
Sver.1G.00822		Q18DC8	0.463	peptidase A1 family
Sver.13G.00407		Q8AY75	0.386	calmodulin family
Sver.24G.00111		P0DQV8	0.414	true venom lectin family
Sver.9G.00534		C0K3N5	0.49	PDGF/VEGF growth factor family
Sver.14G.00557		Q7M4I3	0.376	peptidase S1 family
Sver.14G.00552		Q7M4I3	0.364	peptidase S1 family
Sver.7G.00810		J3SE80	0.429	cystatin family
Sver.24G.00257		A0A6B9KZ40	0.369	the actin depolymerising protein gelsolin family
Sver.19G.00397		P0CV91	0.9	peroxiredoxin family
Sver.16G.00409		C0K3N4	0.465	PDGF/VEGF growth factor family
Sver.11G.00676		Q9I840	0.266	snaclec family
Sver.9G.00632		B2BS84	0.296	venom Kunitz-type family
Sver.1G.00671		A0A1U9VX91	0.381	glycerotoxin(GLTx)
Sver.15G.00747		A6MFK7	0.323	peptidase S1 family
Sver.2G.00627		J3RZ81	0.6	Lipase family
Sver.21G.00449		P0DPU3	0.352	unassigned family
Sver.7G.00774		P85031	0.387	Tachylectin family
Sver.12G.00234		P0CV91	0.59	peroxiredoxin family
Sver.8G.01015		C0K3N5	0.547	PDGF/VEGF growth factor family
Sver.13G.00129		P0DMW6	0.446	venom Kunitz-type family
Sver.17G.00998		Q09GJ9	0.328	CRISP family
Sver.21G.00324		A0A6B9KZ40	0.411	the actin depolymerising protein gelsolin family
Sver.22G.00245		Q05108	0.306	CRISP family
Sver.16G.00541		Q92035	0.338	type-B carboxylesterase/lipase family
Sver.24G.00112		P0DQV8	0.434	true venom lectin family
Sver.1G.00576		Q58L94	0.403	peptidase S1 family
Sver.13G.00339		W4VS99	0.327	peptidase M13 family
Sver.18G.00419		P00990	0.49	venom Kunitz-type family
Sver.5G.00145		P0CV91	0.825	peroxiredoxin family
Sver.13G.00433		Q58L94	0.327	peptidase S1 family
Sver.4G.00837		A3QVN9	0.433	glycosyl hydrolase 56 family
Sver.21G.00080		Q7SZN0	0.286	multicopper oxidase family
Sver.16G.00738		J3SBP3	0.501	nucleotide pyrophosphatase/phosphodiesterase family
Sver.1G.00420		C9WMM5	0.294	peptidase S10 family
Sver.1G.00386		Q2UXR0	0.24	venom metalloproteinase (M12B) family
Sver.14G.00135		G4V4G1	0.333	IGFBP family
Sver.3G.00061		C9WMM5	0.292	peptidase S10 family
Sver.6G.00449		D8VNS7	0.369	ficolin lectin family
Sver.5G.00786		A7X3X3	0.344	true venom lectin family
Sver.21G.00636		P0DSL4	0.525	EGF domain peptide family
Sver.20G.00604		D8VNS7	0.464	ficolin lectin family
Sver.23G.00216		D8VNS7	0.416	ficolin lectin family
Sver.3G.00435		W4VS99	0.335	peptidase M13 family
Sver.11G.00489		P0DV05	0.472	venom Kunitz-type family
Sver.8G.00343		C9WMM5	0.508	peptidase S10 family
Sver.6G.00719		G4V4G1	0.33	IGFBP family
Sver.21G.00383		P23631	0.388	cationic peptide 01 (latrotoxin) family
Sver.14G.00379		F8RKW1	0.356	venom metalloproteinase (M12B) family
Sver.1G.00374		P35780	0.327	CRISP family
Sver.2G.01050		F8RKW1	0.446	venom metalloproteinase (M12B) family
Sver.2G.00317		F8J2D3	0.342	phospholipase B-like family
Sver.4G.00383		Q8T0W5	0.442	serine protease inhibitor-like (TIL domain-containing) family
Sver.13G.00130		Q58L93	0.336	peptidase S1 family
Sver.14G.00088		J3SDX8	0.545	Lipase family
Sver.1G.00685		Q58L91	0.388	multicopper oxidase family
Sver.3G.00582		J3S820	0.434	glycosyl hydrolase 56 family
Sver.8G.00304		Q58L93	0.34	peptidase S1 family
Sver.15G.00981		O13060	0.358	peptidase S1 family
Sver.18G.00314		B2D0J4	0.316	peptidase S9B family
Sver.1G.00045		A0A8B0RBM2	0.284	type-B carboxylesterase/lipase family
Sver.2G.00055		P0DPU3	0.358	unassigned family
Sver.19G.00939		Q9YI19	0.26	venom metalloproteinase (M12B) family
Sver.6G.00835		J3RZ81	0.528	Lipase family
Sver.5G.00796		Q5ECE3	0.324	Lipocalin family
Sver.15G.00508		Q18DC9	0.467	peptidase A1 family
Sver.2G.00876		F8RKW0	0.349	venom metalloproteinase (M12B) family
Sver.4G.00430		J3S9D9	0.479	CREC family
Sver.9G.00827		Q90YA8	0.596	glutaminyl-peptide cyclotransferase family
Sver.16G.00457		Q8MMH3	0.358	damage-control phosphatase family
Sver.6G.00160		A6MFK7	0.486	peptidase S1 family
Sver.3G.00126		P13211	0.667	endothelin/sarafotoxin family
Sver.13G.00680		J3S836	0.249	venom complement C3 homolog family
Sver.4G.00565		Q6X1T6	0.278	venom metalloproteinase (M12B) family
Sver.16G.00032		Q1PBD1	0.242	venom metalloproteinase (M12B) family
Sver.16G.00003		B2BS84	0.321	peptidase S9B family
Sver.23G.00417		Q2XXL4	0.481	ohanin/vespryn family
Sver.19G.00555		Q7SZN0	0.303	multicopper oxidase family
Sver.19G.00513		A0ZSK4	0.324	SNTX/VTX toxin family
Sver.18G.00147		C0K3N1	0.372	PDGF/VEGF growth factor family
Sver.1G.00575		Q58L95	0.394	peptidase S1 family
Sver.7G.00334		Q7SZN0	0.334	multicopper oxidase family
Sver.2G.00904		Q9XZC0	0.346	cationic peptide 01 (latrotoxin) family
Sver.14G.00563		Q7M4I3	0.38	peptidase S1 family
Sver.8G.00006		W4VSH9	0.368	venom Kunitz-type family
Sver.15G.00527		A0A6B9KZ40	0.337	the actin depolymerising protein gelsolin family
Sver.12G.00416		F8RKW1	0.382	venom metalloproteinase (M12B) family
Sver.8G.00007		P0DQR1	0.455	nucleotide pyrophosphatase/phosphodiesterase family
Sver.4G.00952		Q58L91	0.407	multicopper oxidase family
Sver.1G.00608		D2YVH7	0.382	true venom lectin family
Sver.4G.00266		Q92035	0.327	type-B carboxylesterase/lipase family
Sver.18G.00207		Q8QG89	0.283	venom metalloproteinase (M12B) family
Sver.6G.00863		Q91132	0.23	venom complement C3 homolog family
Sver.15G.00464		F8J2D3	0.522	phospholipase B-like family
Sver.3G.00633		A3QVN9	0.43	glycosyl hydrolase 56 family
Sver.5G.00503	Lactotransferrin	K9IMD0	0.462	transferrin family
Sver.23G.00103		Q92035	0.344	type-B carboxylesterase/lipase family
Sver.6G.00922		A0A1U9VX91	0.365	glycerotoxin(GLTx)
Sver.9G.00074		Q76B45	0.317	peptidase S1 family
Sver.12G.00815		Q7M4I3	0.332	peptidase S1 family
Sver.2G.00847		Q7SZN0	0.356	multicopper oxidase family
Sver.6G.00502		P84715	0.46	natriuretic peptide family
Sver.14G.00491		A8QL49	0.3	venom metalloproteinase (M12B) family
Sver.11G.00668		B2D0J4	0.338	peptidase S9B family
Sver.6G.00317		K9IMD0	0.373	transferrin family
Sver.17G.01008		Q58L93	0.337	peptidase S1 family
Sver.11G.00002		A0A2U8QPE6	0.249	flavin monoamine oxidase family
Sver.15G.00967		A7X413	0.305	true venom lectin family
Sver.6G.00834		D5LMJ3	0.255	venom metalloproteinase (M12B) family
Sver.2G.00617		Q1PBD1	0.261	venom metalloproteinase (M12B) family
Sver.21G.00060		Q3SB11	0.349	calmodulin family
Sver.18G.00460		W8E7D1	0.341	nucleotide pyrophosphatase/phosphodiesterase family
Sver.2G.00599		Q76B45	0.339	peptidase S1 family
Sver.14G.00588		Q91453	0.342	SNTX/VTX toxin family
Sver.13G.00368		Q90YA8	0.544	glutaminyl-peptide cyclotransferase family
Sver.14G.00553		O73800	0.317	peptidase S1 family
Sver.19G.00045		Q58L94	0.579	peptidase S1 family
Sver.24G.00581		A8QL59	0.385	venom metalloproteinase (M12B) family
Sver.14G.00177		A0A0B4U9L8	0.371	venom metalloproteinase (M12B) family
Sver.5G.00168		D8VNT0	0.423	ficolin lectin family
Sver.18G.00356		Q92035	0.324	type-B carboxylesterase/lipase family
Sver.8G.00047		F8RKW0	0.361	venom metalloproteinase (M12B) family
Sver.20G.00752		P81383	0.247	flavin monoamine oxidase family
Sver.18G.00217		B2D0J4	0.343	peptidase S9B family
Sver.8G.00610		Q9PT51	0.325	peptidase S1 family
Sver.2G.00088		D8VNS7	0.418	ficolin lectin family
Sver.12G.00676		G4V4G1	0.319	IGFBP family
Sver.6G.00714		E5L0E3	0.28	peptidase S1 family
Sver.5G.00847		P85843	0.583	glycosyl hydrolase 13 family
Sver.23G.00102		Q2XXQ5	0.362	CRISP family
Sver.12G.00616		Q10749	0.381	venom metalloproteinase (M12B) family
Sver.18G.00208		Q1PBD1	0.249	venom metalloproteinase (M12B) family
Sver.19G.00343		Q9PVK9	0.271	venom metalloproteinase (M12B) family
Sver.8G.00324		J3S836	0.293	venom complement C3 homolog family
Sver.9G.00260		K9IMD0	0.353	transferrin family
Sver.14G.00549		Q71QH6	0.302	peptidase S1 family
Sver.19G.00358		E5L0E3	0.292	peptidase S1 family
Sver.1G.00627		C0K3N1	0.34	PDGF/VEGF growth factor family
Sver.16G.00793		Q6ITB9	0.42	venom Kunitz-type family
Sver.14G.00550		O73800	0.317	peptidase S1 family
Sver.4G.00034		P0DUJ6	0.609	CART family
Sver.6G.00907		Q1L658	0.607	peptidase S1 family
Sver.18G.00393		P84032	0.279	Ctenidae family
Sver.23G.00157		Q3HXX4	0.494	NGF-beta family
Sver.24G.00548		G4V4G1	0.358	IGFBP family
Sver.2G.00621		P0DKM8	0.489	conopeptide P-like superfamily
Sver.3G.00508		K9IMD0	0.352	transferrin family
Sver.11G.00847		Q9PTL3	0.278	peptidase S1 family
Sver.13G.00050		W4VS99	0.331	peptidase M13 family
Sver.18G.00218		P20394	0.355	glucagon family
Sver.3G.00928		Q2XXL4	0.475	ohanin/vespryn family
Sver.13G.00673		Q7SZD9	0.285	venom metalloproteinase (M12B) family
Sver.3G.00583		A3QVN9	0.446	glycosyl hydrolase 56 family
Sver.24G.00109		P0DQV8	0.438	true venom lectin family
Sver.21G.00336		Q9XZC0	0.359	cationic peptide 01 (latrotoxin) family
Sver.5G.00754		Q98989	0.404	SNTX/VTX toxin family
Sver.14G.00548		O73800	0.317	peptidase S1 family
Sver.12G.00422		Q58L93	0.339	peptidase S1 family
Sver.24G.00344		Q7T229	0.347	peptidase S1 family
Sver.15G.00051		Q7M4I3	0.407	peptidase S1 family
Sver.7G.00544		Q9YI19	0.23	venom metalloproteinase (M12B) family
Sver.5G.00396		A0ZSK4	0.406	SNTX/VTX toxin family
Sver.22G.00521		W4VS99	0.309	peptidase M13 family
Sver.14G.00160		Q7Z269	0.289	peptidase S1 family
Sver.7G.00656		Q8AY75	0.315	calmodulin family
Sver.10G.00245		Q91453	0.308	SNTX/VTX toxin family
Sver.16G.00197		W8E7D1	0.333	nucleotide pyrophosphatase/phosphodiesterase family
Sver.3G.00825		A0A6B9KZ40	0.392	the actin depolymerising protein gelsolin family
Sver.4G.00664		Q9PVK9	0.258	venom metalloproteinase (M12B) family
Sver.2G.00997		D8VNS7	0.434	ficolin lectin family
Sver.6G.00027		P0DUJ6	0.34	CART family
Sver.19G.00947		A6MFK8	0.331	peptidase S1 family
Sver.11G.00163		Q66S03	0.363	true venom lectin family
Sver.6G.00836		J3RZ81	0.493	Lipase family
Sver.17G.00664		Q18DC8	0.367	peptidase A1 family
Sver.16G.00641		P0DJ50	0.549	venom Kunitz-type family
Sver.4G.00357		O13058	0.299	peptidase S1 family
Sver.16G.00265		A6MFK7	0.559	peptidase S1 family
Sver.14G.00555		Q71QH6	0.302	peptidase S1 family
Sver.1G.00914		Q1PBD1	0.25	venom metalloproteinase (M12B) family
Sver.7G.00729		Q92031	0.326	venom metalloproteinase (M12B) family
Sver.19G.00091		Q7M4I3	0.299	peptidase S1 family
Sver.21G.00458		Q2XXL4	0.4	ohanin/vespryn family
Sver.19G.00360		P84033	0.295	peptidase S1 family
Sver.3G.00700		A0A2P1BRP3	0.348	SNTX/VTX toxin family
Sver.19G.00403		Q06478	0.313	Lipase family
Sver.1G.00706		Q98UF9	0.253	venom metalloproteinase (M12B) family
Sver.5G.00397		Q98993	0.407	SNTX/VTX toxin family
Sver.5G.00399		Q98993	0.404	SNTX/VTX toxin family
Sver.14G.00360		A3R0T9	0.376	venom metalloproteinase (M12B) family
Sver.11G.00824		Q58L91	0.39	multicopper oxidase family
Sver.8G.01006		J3SEZ3	0.501	nucleotide pyrophosphatase/phosphodiesterase family
Sver.12G.00431		D8VNS7	0.407	ficolin lectin family
Sver.10G.00243		Q91453	0.394	SNTX/VTX toxin family
Sver.14G.00560		Q9TXD8	0.347	peptidase S1 family
Sver.6G.00727		Q9PT51	0.32	peptidase S1 family
Sver.3G.00616		W4VS99	0.333	peptidase M13 family
Sver.11G.00588		F8RKW0	0.31	venom metalloproteinase (M12B) family
Sver.14G.00403		Q7SZE0	0.232	venom metalloproteinase (M12B) family
Sver.2G.00247		Q58L91	0.419	multicopper oxidase family
Sver.13G.00899		Q18DC8	0.267	peptidase A1 family
Sver.10G.00246		A0ZSK4	0.291	SNTX/VTX toxin family
Sver.17G.00800		Q3HXY9	0.475	NGF-beta family
Sver.20G.00595		J3SBP3	0.469	nucleotide pyrophosphatase/phosphodiesterase family
Sver.2G.00027		G4V4G1	0.424	IGFBP family
Sver.15G.00085		A0ZSK4	0.399	SNTX/VTX toxin family
Sver.20G.00460		P13211	0.667	endothelin/sarafotoxin family
Sver.4G.00852		F8S122	0.389	ohanin/vespryn family
Sver.20G.00084		A8QL56	0.352	peptidase S1 family
Sver.17G.00014		P13211	0.667	endothelin/sarafotoxin family
Sver.13G.00430		B5U2W0	0.388	peptidase S1 family
Sver.5G.00398		Q98993	0.412	SNTX/VTX toxin family
Sver.7G.00649		Q92035	0.283	type-B carboxylesterase/lipase family
Sver.22G.00524		B2D0J4	0.279	peptidase S9B family
Sver.15G.00917		D8VNT0	0.441	ficolin lectin family
Sver.17G.00041		Q76B45	0.333	peptidase S1 family
Sver.23G.00204		A3QVN9	0.416	glycosyl hydrolase 56 family
Sver.15G.00061		B5U2W0	0.38	peptidase S1 family
Sver.16G.00753		Q2XXQ5	0.481	CRISP family
Sver.18G.00244		Q58L91	0.403	multicopper oxidase family
Sver.13G.00672		Q7SZD9	0.282	venom metalloproteinase (M12B) family
Sver.18G.00388		A0A2P1BRQ0	0.376	SNTX/VTX toxin family
Sver.6G.00725		Q5W960	0.354	peptidase S1 family
Sver.4G.00838		A3QVN9	0.433	glycosyl hydrolase 56 family
Sver.1G.00087		Q92043	0.297	venom metalloproteinase (M12B) family
Sver.3G.00999		Q7SZD9	0.264	venom metalloproteinase (M12B) family
Sver.18G.00041		A6MFK8	0.498	peptidase S1 family
Sver.6G.00399		Q7SZE0	0.259	venom metalloproteinase (M12B) family
Sver.6G.00322		Q593B6	0.306	multicopper oxidase family
Sver.24G.00187		Q98989	0.308	SNTX/VTX toxin family
Sver.17G.00042		P81824	0.322	peptidase S1 family
Sver.20G.00594		P0DQQ4	0.519	nucleotide pyrophosphatase/phosphodiesterase family
Sver.13G.00011		A6MFK8	0.304	peptidase S1 family
Sver.15G.00879		P83234	0.339	ohanin/vespryn family
Sver.17G.00414		Q05108	0.314	CRISP family
Sver.3G.00386		Q3HXY9	0.531	NGF-beta family
Sver.6G.00726		A7LAC6	0.3	peptidase S1 family
Sver.11G.00519		Q2XXL4	0.447	ohanin/vespryn family
Sver.2G.00052		P0DPU3	0.457	unassigned family
Sver.10G.01044		F8S122	0.406	ohanin/vespryn family
Sver.2G.00634		Q9PT51	0.372	peptidase S1 family
Sver.8G.00678		Q9PT51	0.364	peptidase S1 family
Sver.16G.00052		A0A2I4HXH5	0.617	5'-nucleotidase family
Sver.2G.00084		Q7ZZS9	0.231	venom metalloproteinase (M12B) family
Sver.15G.00870		A0A2P1BRQ0	0.341	SNTX/VTX toxin family
Sver.6G.00715		B0FXM2	0.302	peptidase S1 family
Sver.1G.00288		Q5YF89	0.487	NGF-beta family
Sver.17G.00043		P84033	0.332	peptidase S1 family
Sver.2G.00521		A0A4Y5X186	0.548	vasopressin/oxytocin family
Sver.2G.00797		Q7SZE0	0.221	venom metalloproteinase (M12B) family
Sver.7G.00749		A0A0B5A8Q2	0.298	insulin family
Sver.14G.00272		P81824	0.339	peptidase S1 family
Sver.4G.00530		Q8T0W5	0.333	serine protease inhibitor-like (TIL domain-containing) family
Sver.11G.00647		A8Y7P2	0.49	venom Kunitz-type family
Sver.18G.00040		Q58L93	0.353	peptidase S1 family
Sver.21G.00153		J3S830	0.245	venom metalloproteinase (M12B) family
Sver.7G.00295		C0K3N5	0.448	PDGF/VEGF growth factor family
Sver.20G.00660		P85031	0.38	Tachylectin family
Sver.21G.00212		P80966	0.552	phospholipase A2 family
Sver.10G.00473		Q7T229	0.388	peptidase S1 family
Sver.16G.00239		P83906	0.478	PDGF/VEGF growth factor family
Sver.14G.00918		A0A6P8HC43	0.346	venom Kunitz-type family
Sver.8G.00853		H6VC05	0.451	venom Kunitz-type family
Sver.14G.00779		F8J2D3	0.487	phospholipase B-like family
Sver.5G.00521		D8VNS7	0.439	ficolin lectin family
Sver.6G.00928		Q9TXD8	0.321	peptidase S1 family
Sver.6G.00689		A0ZSK3	0.304	SNTX/VTX toxin family
Sver.3G.00575		Q8AY75	0.787	calmodulin family
Sver.17G.00663		Q2XXR8	0.553	AVIT (prokineticin) family
Sver.20G.00387		P85031	0.388	Tachylectin family
Sver.24G.00108		P0DQV8	0.444	true venom lectin family
Sver.10G.01047		C0K3N1	0.314	PDGF/VEGF growth factor family
Sver.13G.00001		Q58L93	0.368	peptidase S1 family
Sver.10G.00147		J3S836	0.317	venom complement C3 homolog family
Sver.24G.00534		Q92035	0.62	type-B carboxylesterase/lipase family
Sver.20G.00835		A0A6B9KZ40	0.409	the actin depolymerising protein gelsolin family
Sver.18G.00039		A6MFK8	0.402	peptidase S1 family
Sver.21G.00620		A0A1U9VX91	0.27	glycerotoxin(GLTx)
Sver.4G.00823		A0A2P1BRQ0	0.287	SNTX/VTX toxin family
Sver.21G.00213		P80966	0.58	phospholipase A2 family
Sver.21G.00498		Q8AY75	0.373	calmodulin family
Sver.16G.00053		B6EWW8	0.587	5'-nucleotidase family
Sver.10G.00179		E0Y419	0.297	peptidase S1 family
Sver.15G.00863		A0A2P1BRP3	0.321	SNTX/VTX toxin family
Sver.11G.00165	Galactose-specific lectin nattectin	Q66S03	0.383	true venom lectin family
Sver.10G.00383		Q4JHE1	0.511	flavin monoamine oxidase family
Sver.14G.00328		Q76B45	0.28	peptidase S1 family
Sver.8G.00447		Q8AWI5	0.307	venom metalloproteinase (M12B) family
Sver.19G.00223		Q92035	0.336	type-B carboxylesterase/lipase family
Sver.10G.00077		A0ZSK4	0.297	SNTX/VTX toxin family
Sver.12G.00577		B5U2W0	0.353	peptidase S1 family
Sver.21G.00724		D8VNT0	0.458	ficolin lectin family
Sver.13G.00670		A8QL51	0.444	flavin monoamine oxidase family
Sver.10G.00319		K7Z9Q9	0.403	unassigned family
Sver.9G.00345		F8S0Z7	0.602	5'-nucleotidase family
Sver.20G.00336		P0DP55	0.889	NPY family
Sver.24G.00070		A7X3Z4	0.341	true venom lectin family
Sver.8G.00361		P0DP55	0.57	NPY family
Sver.8G.00677		Q76B45	0.383	peptidase S1 family
Sver.8G.00839		Q2XXQ5	0.493	CRISP family
Sver.3G.01088		D8VNS8	0.414	ficolin lectin family
Sver.8G.00278		A8QL57	0.436	peptidase S1 family
Sver.24G.00107		P0DQV8	0.438	true venom lectin family
Sver.14G.00677		E2E4L2	0.464	NPY family
Sver.18G.00038		Q58L93	0.403	peptidase S1 family
Sver.22G.00336		A0A6B9KZ40	0.386	the actin depolymerising protein gelsolin family
Sver.17G.00091		A3QVN3	0.34	glycosyl hydrolase 56 family
Sver.24G.00063		Q91453	0.297	SNTX/VTX toxin family
Sver.18G.00042		Q56VR3	0.34	peptidase S1 family
Sver.23G.00059		Q18DC8	0.388	peptidase A1 family
Sver.21G.00457		K7Z9Q9	0.427	unassigned family
Sver.8G.00111		Q92035	0.301	type-B carboxylesterase/lipase family
Sver.10G.00189		Q9TXD8	0.343	peptidase S1 family
Sver.16G.00592		A0FKN6	0.355	metalloproteinase (MP) family
Sver.6G.00285		P85031	0.358	Tachylectin family
Sver.11G.00247		B2D0J4	0.309	peptidase S9B family
Sver.10G.00857		J3S836	0.421	venom complement C3 homolog family
Sver.13G.00762		Q8AY75	0.365	calmodulin family
Sver.24G.00019		P0CV87	0.8	natriuretic peptide family
Sver.3G.00703		Q18DC8	0.349	peptidase A1 family
Sver.8G.00599		P84715	0.545	natriuretic peptide family
Sver.1G.00387		J3RZ81	0.457	Lipase family
Sver.22G.00566		J3RZ81	0.388	Lipase family
Sver.18G.00100		Q8JI38	0.554	CRISP family
Sver.11G.00732		Q92035	0.359	type-B carboxylesterase/lipase family
Sver.8G.00676		A8QL56	0.398	peptidase S1 family
Sver.13G.00591		Q92035	0.488	type-B carboxylesterase/lipase family
Sver.2G.00030		Q92035	0.319	type-B carboxylesterase/lipase family
Sver.11G.00900		A6MFL0	0.459	flavin monoamine oxidase family
Sver.10G.00148		I2C090	0.304	venom complement C3 homolog family
Sver.13G.00240		P16354	0.457	phospholipase A2 family
Sver.13G.00286		B5G6G5	0.367	peptidase S1 family
Sver.19G.00359		Q6T5L0	0.324	peptidase S1 family
Sver.5G.00519		D8VNS7	0.486	ficolin lectin family
Sver.21G.00385		Q6T269	0.413	venom Kunitz-type family
Sver.24G.00106		P0DQV8	0.438	true venom lectin family
Sver.18G.00032		A6MFK8	0.283	peptidase S1 family
Sver.24G.00477		Q92035	0.325	type-B carboxylesterase/lipase family
Sver.5G.00776		P04204	0.606	glucagon family
Sver.7G.00887		A0A2D0TC04	0.284	nucleotide pyrophosphatase/phosphodiesterase family
Sver.11G.00462		P23807	0.429	snaclec family
Sver.8G.00152		B5U2W0	0.352	peptidase S1 family
Sver.17G.00361		Q9PT51	0.408	peptidase S1 family
Sver.1G.00428		Q7ZZN9	0.324	CRISP family
Sver.15G.00218		P0DP54	0.739	phospholipase A2 family
Sver.15G.00650		A0A6P8HC43	0.379	venom Kunitz-type family
Sver.3G.00578		P05620	0.274	peptidase S1 family
Sver.22G.00246		P0DPU1	0.342	CRISP family
Sver.15G.00816		Q98989	0.25	SNTX/VTX toxin family
Sver.11G.00166		Q66S03	0.367	true venom lectin family
Sver.11G.00891		Q58L93	0.331	peptidase S1 family
Sver.22G.00293		Q58L93	0.319	peptidase S1 family
Sver.13G.00099		W4VS99	0.289	peptidase M13 family
Sver.11G.00010		Q593B6	0.306	multicopper oxidase family
Sver.8G.00323		D8VNS7	0.452	ficolin lectin family
Sver.16G.00362		D8VNS7	0.445	ficolin lectin family
Sver.5G.00988		P0DP56	0.692	opioid neuropeptide precursor family
Sver.20G.00711		Q5MCS0	0.429	peptidase S1 family
Sver.15G.00287		F8RKW0	0.299	venom metalloproteinase (M12B) family
Sver.2G.00844		B4XT00	0.254	snaclec family
Sver.4G.00578		P0CJ14	0.475	unassigned family
Sver.14G.00480		Q4QXT9	0.3	peptidase S1 family
Sver.10G.00758		Q6T6T5	0.558	venom Kunitz-type family
Sver.22G.00346		Q76B45	0.288	peptidase S1 family
Sver.10G.00437		Q7M4I3	0.329	peptidase S1 family
Sver.24G.00056		D8VNT0	0.353	ficolin lectin family
Sver.14G.00591		Q5BLY5	0.273	histidine acid phosphatase family
Sver.17G.00889		Q18DC9	0.521	peptidase A1 family
Sver.10G.00045		D8VNS7	0.441	ficolin lectin family
Sver.4G.00508		F8S122	0.336	ohanin/vespryn family
Sver.10G.00756		Q3SB11	0.331	calmodulin family
Sver.21G.00190		P16354	0.435	phospholipase A2 family
Sver.15G.00140		Q98989	0.328	SNTX/VTX toxin family
Sver.14G.00889		Q18DC8	0.402	peptidase A1 family
Sver.14G.00873		Q18DC8	0.392	peptidase A1 family
Sver.23G.00328		P81658	0.451	venom Kunitz-type family
Sver.1G.00529		A6MFK7	0.291	peptidase S1 family
Sver.4G.00825		Q2XXL4	0.42	ohanin/vespryn family
Sver.23G.00010		Q8QG86	0.333	peptidase S1 family
Sver.6G.00903		Q92035	0.317	type-B carboxylesterase/lipase family
Sver.5G.00483		B2D0J4	0.289	peptidase S9B family
Sver.14G.00875		Q18DC8	0.403	peptidase A1 family
Sver.8G.00267		Q5MCS0	0.43	peptidase S1 family
Sver.19G.00443		Q66S03	0.286	true venom lectin family
Sver.13G.00687		Q91132	0.24	venom complement C3 homolog family
Sver.8G.00874		Q7LZK5	0.313	snaclec family
Sver.2G.00843		B0VXV2	0.267	snaclec family
Sver.2G.00023		J3S836	0.265	venom complement C3 homolog family
Sver.14G.00849		Q18DC8	0.403	peptidase A1 family
Sver.4G.00743		Q92035	0.356	type-B carboxylesterase/lipase family
Sver.14G.00855		Q18DC8	0.401	peptidase A1 family
Sver.3G.01070		P0DPU3	0.248	unassigned family
Sver.14G.00886		Q18DC8	0.403	peptidase A1 family
Sver.14G.00870		Q18DC8	0.401	peptidase A1 family
Sver.24G.00055		P85031	0.333	Tachylectin family
Sver.22G.00294		Q56VR3	0.344	peptidase S1 family
Sver.6G.00701		Q7LZK5	0.378	snaclec family
Sver.5G.00648		A0FKN6	0.369	metalloproteinase (MP) family
Sver.21G.00707		D8VNS7	0.509	ficolin lectin family
Sver.1G.00826		Q8JIW1	0.326	snaclec family
Sver.8G.00294		P84033	0.341	peptidase S1 family
Sver.14G.00544		Q3SB11	0.293	calmodulin family
Sver.20G.00586		D8VNS7	0.429	ficolin lectin family
Sver.14G.00865		Q18DC8	0.401	peptidase A1 family
Sver.21G.00448		P0DPU3	0.467	unassigned family
Sver.8G.00268		Q5MCS0	0.425	peptidase S1 family
Sver.6G.00073		Q593B6	0.383	multicopper oxidase family
Sver.15G.01055		E2E4L2	0.596	NPY family
Sver.19G.00831		Q8AY75	0.355	calmodulin family
Sver.17G.00516		Q6LEM5	0.625	natriuretic peptide family
Sver.24G.00457		Q2XXL4	0.42	ohanin/vespryn family
Sver.17G.00485		Q98989	0.335	SNTX/VTX toxin family
Sver.21G.00313		Q92035	0.339	type-B carboxylesterase/lipase family
Sver.14G.00862		Q18DC8	0.401	peptidase A1 family
Sver.7G.00253		A6MFK8	0.423	peptidase S1 family
Sver.5G.00340		P0DPU0	0.333	CRISP family
Sver.3G.00901		P18964	0.34	peptidase S1 family
Sver.8G.00674		Q76B45	0.384	peptidase S1 family
Sver.16G.00063		J3S836	0.25	venom complement C3 homolog family
Sver.24G.00043		Q9I8X2	0.31	peptidase S1 family
Sver.4G.00836		A3QVN2	0.57	glycosyl hydrolase 56 family
Sver.14G.00884		Q18DC8	0.401	peptidase A1 family
Sver.19G.00779		P82807	0.366	peptidase S1 family
Sver.8G.00675		A8QL56	0.411	peptidase S1 family
Sver.5G.00657		Q58L96	0.345	peptidase S1 family
Sver.1G.00029		P84033	0.318	peptidase S1 family
Sver.1G.00635		Q593B6	0.406	multicopper oxidase family
Sver.16G.00596		Q58L94	0.305	peptidase S1 family
Sver.7G.00078		D2YVJ6	0.288	true venom lectin family
Sver.20G.00814		C0HLB2	0.538	venom Kunitz-type family
Sver.8G.00012		A0A2D0TC04	0.295	nucleotide pyrophosphatase/phosphodiesterase family
Sver.24G.00462		Q3SB11	0.311	calmodulin family
Sver.21G.00312		Q92035	0.333	type-B carboxylesterase/lipase family
Sver.11G.00248		B2D0J4	0.308	peptidase S9B family
Sver.5G.00603		A7X413	0.286	true venom lectin family
Sver.5G.00582		Q9TXD8	0.33	peptidase S1 family
Sver.11G.00164		Q66S03	0.397	true venom lectin family
Sver.2G.00845		Q9DG39	0.287	snaclec family
Sver.24G.00144		B5U6Y3	0.333	peptidase S1 family
Sver.21G.00335		Q4JHE1	0.23	flavin monoamine oxidase family
Sver.21G.00311		Q92035	0.328	type-B carboxylesterase/lipase family
Sver.19G.00292		W4VSJ0	0.29	type-B carboxylesterase/lipase family
Sver.17G.00362		Q9DF67	0.374	peptidase S1 family
GSAman00003			0.478	SNTX/VTX toxin family
Sver.12G.00802		J3RZ81	0.309	Lipase family
Sver.10G.00858		Q0ZZJ6	0.413	venom complement C3 homolog family
Sver.5G.00408		A6MFK7	0.419	peptidase S1 family
Sver.3G.00900		Q76B45	0.375	peptidase S1 family
Sver.3G.00355		Q58L94	0.302	peptidase S1 family
Sver.3G.00354		Q27J47	0.315	peptidase S1 family
Sver.3G.00353		Q58L94	0.315	peptidase S1 family
Sver.3G.00192		Q2XXR7	0.596	AVIT (prokineticin) family
Sver.2G.00883		P80966	0.516	phospholipase A2 family
Sver.2G.00819		Q66S17	0.381	natterin family
Sver.2G.00708		Q8AY75	0.403	calmodulin family
Sver.2G.00526		A0A4Y5X186	0.49	vasopressin/oxytocin family
Sver.1G.00031		P84033	0.318	peptidase S1 family
Sver.1G.00030		Q91453	0.406	SNTX/VTX toxin family
Sver.1G.00028		Q8AY78	0.349	peptidase S1 family
GSAman00005			0.481	SNTX/VTX toxin family
